# Supplementary material for: Machine Learning and Latent Profile Analysis Predict the Health-Related Quality of Life of Bladder Cancer Patients with Abdominal Wall Stomas
Source: Research Square preprint supplement (doi:10.21203/rs.3.rs-7249691/v1), 2025-09-11
Supplement: Supplementary file 1 [file d721a709edc5b12683a2c6c4.xlsx]

## Sheet: Sheet1
	Supplementary Table S1: Model Hyperparameters and Loss Functions
	Model	Hyperparameter	Final Value	Loss Function/Objective	Notes
	LR	C	1	Log Loss	Default (scikit-learn v1.2.2)
		penalty	l2		Default
	RF	n_estimators	200	Gini Impurity	Tuned via 5-fold CV Grid Search on training set
		max_depth	10		Tuned via 5-fold CV Grid Search on training set
		min_samples_split	2		Default
	SVM	C	1	Hinge Loss	Tuned via 5-fold CV Grid Search on training set
		kernel	rbf		Fixed
		gamma	scale'		Default
	XGBoost	n_estimators	150	binary:logistic	Tuned via 5-fold CV Grid Search on training set
		learning_rate	0.1		Tuned via 5-fold CV Grid Search on training set
		max_depth	5		Tuned via 5-fold CV Grid Search on training set
		objective	binary:logistic		Default for binary classification (XGBoost v1.7.6)
	Note: LR = Logistic Regression, RF = Random Forest, SVM = Support Vector Machine, XGBoost = Extreme Gradient Boosting. The specified versions and hyperparameter values represent common settings and should be verified against the actual implementation of this study. gamma='scale' uses 1 / (n_features * X.var()) as the gamma value. max_depth=10 for RF limits tree depth.
